# Supplementary material
Source: PubMed Central journal article supplement (PMC6692590)
Supplement: BPH-176-3143-s001.pdf [file BPH-176-3143-s001.pdf]

1 **Supporting Information**

2 **Figure S1**

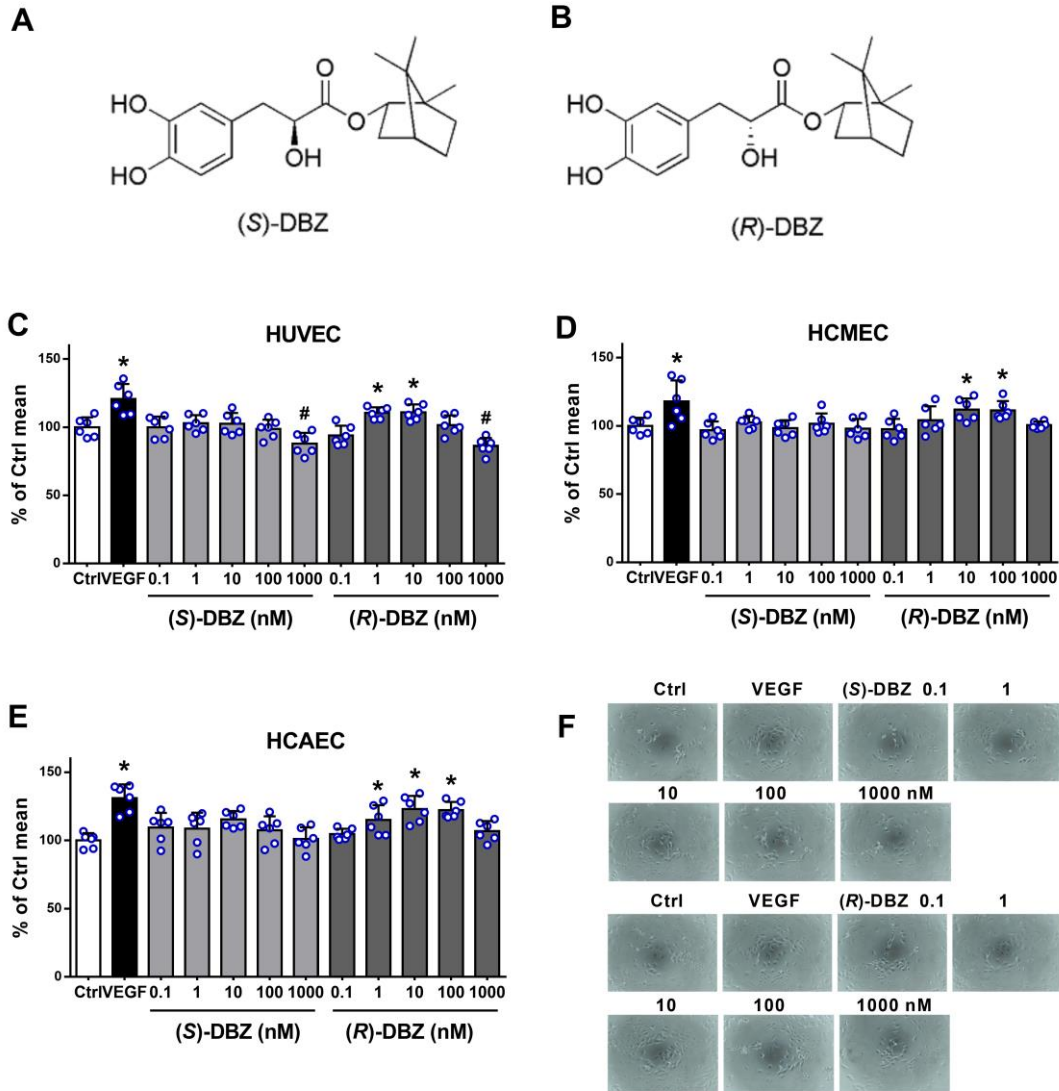

3

4 **Figure S1**

5 Chemical structure of (A) (S)-DBZ and (B) (R)-DBZ and their effects on endothelial cell  
6 proliferation. (C) HUVEC, (D) HCMEC, and (E, F) HCAEC were treated with increasing  
7 concentrations of (S)-DBZ or (R)-DBZ for 48 h respectively, and cell proliferation was  
8 measured by the CCK-8 assays. Cells treated with VEGF-A (20 ng ml<sup>-1</sup>) served as positive  
9 controls. Data are presented as the means ± SD (n = 6 independent experiments performed in

1 triplicate). Statistical analyses were performed by one-way ANOVA followed by Dunnett's  
 2 *post hoc* test or unpaired Student's two-tailed *t*-test. \*P<0.05 vs. control group. HUVEC,  
 3 human umbilical vein endothelial cells; HCMEC, human coronary artery endothelial cells;  
 4 HCAEC, human cardiac microvascular endothelial cells.

6 **Figure S2**

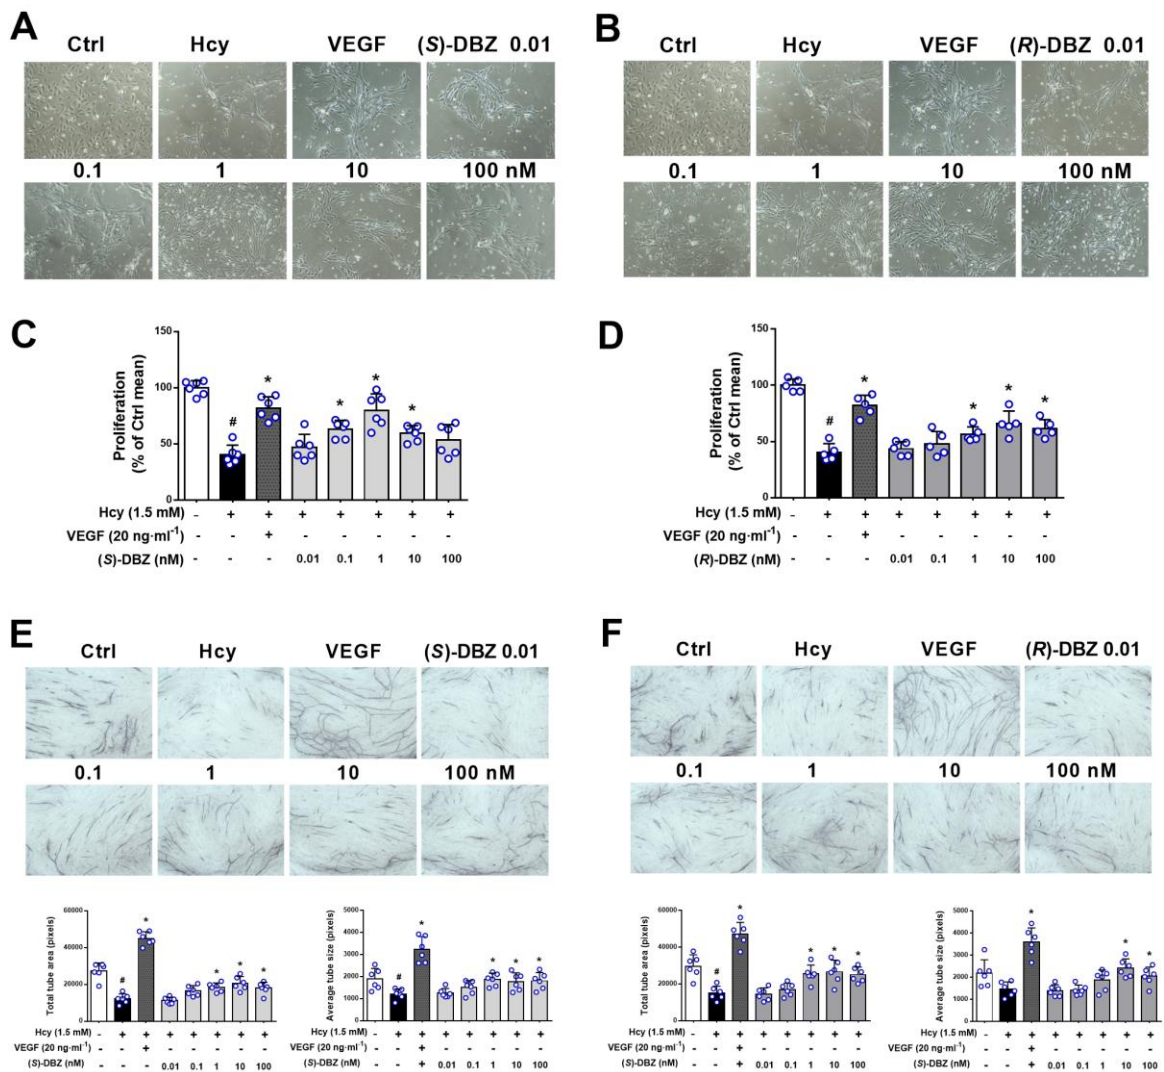

7  
 8 **Figure S2**

9 Effects of (S)-DBZ and (R)-DBZ on HUVEC viability and tube formation in homocysteine  
 10 (Hcy)-injured model. (A-D) HUVEC were pre-treated with various concentrations of DBZ

1 for 2 h, and then treated with 5 mM Hcy. After 48 h of incubation, cell viability was  
 2 determined by Trypan blue assays. (E, F) HUVEC-HDF co-culture systems were pre-treated  
 3 with various concentrations of DBZ for 2 h, then treated with 1.5 mM Hcy. After 12 days of  
 4 incubation, tube formation was determined by vWF immunostaining, and total tube area and  
 5 average tube size was quantified by the ImageJ software. Magnification: 40×. Data are  
 6 presented as the means ± SD (n = 6 independent experiments performed in triplicate for both  
 7 Trypan blue assays and co-culture assays). Statistical analyses were performed by one-way  
 8 ANOVA followed by Dunnett's *post hoc* test or unpaired Student's two-tailed *t*-test. \*P < 0.05  
 9 versus Hcy group, #P < 0.05 versus control group.

10

11 **Figure S3**

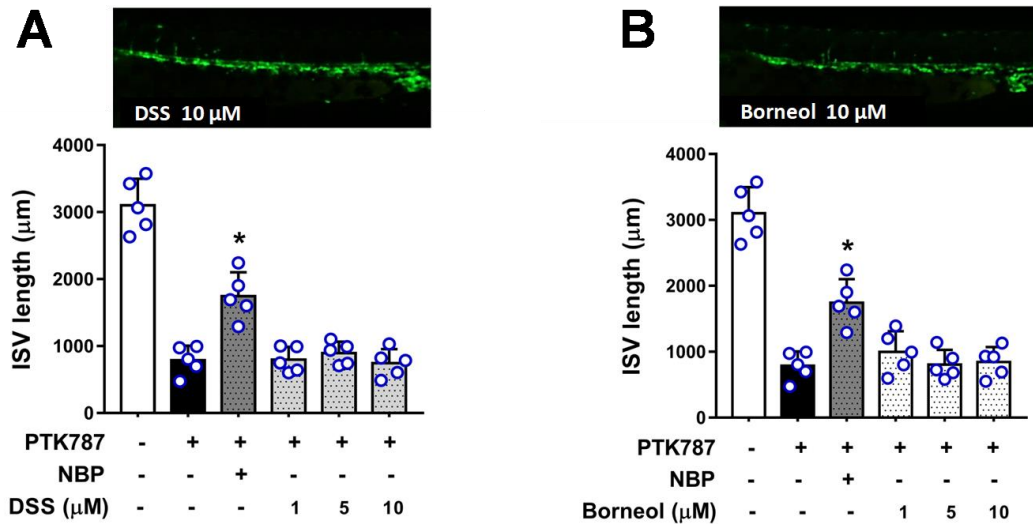

12

13

14 **Figure S3**

15 DSS (A) and borneol (B) have no significant effect on PTK787-induced ISV angiogenesis  
 16 impairment in zebrafish embryos. Embryos were treated with PTK787, PTK787 with NBP,

1 PTK787 with DSS (1, 5, 10  $\mu$ M) or PTK787 with borneol (1, 5, 10  $\mu$ M) for 24 hs. Data were  
 2 analyzed by using the ImageJ software package. Quantitative analysis indicated the total  
 3 length of ISV for each group. Data are presented as the means  $\pm$  SD (10 fish embryos per  
 4 well from 5 time-independent experiments; n = 5). Statistical analyses were performed by  
 5 one-way ANOVA followed by Dunnett's *post hoc* test. \*P<0.05 vs. PTK787 treated group.  
 6 DSS, tanshinol; NBP, butylphthalide.

7  
 8  
 9 **Table S1: Enriched KEGG pathways of DBZ, DSS or Borneol**

| Term                              | adjusted P-value |
|-----------------------------------|------------------|
| <b>DBZ</b>                        |                  |
| hsa04068: FoxO signaling pathway  | 2.73E-04         |
| hsa04066: HIF-1 signaling pathway | 9.02E-04         |
| hsa04611: Platelet activation     | 9.09E-04         |
| hsa04210: Apoptosis               | 0.00362          |
| hsa04530: Tight junction          | 0.00474          |
| hsa04510: Focal adhesion          | 0.0108           |
| hsa04015: Rap1 signaling pathway  | 0.0116           |
| hsa04370: VEGF signaling pathway  | 0.0187           |
| <b>DSS</b>                        |                  |
| hsa04066: HIF-1 signaling pathway | 4.47E-05         |
| hsa04068: FoxO signaling pathway  | 3.01E-04         |
| hsa04210: Apoptosis               | 0.0211           |
| hsa04510: Focal adhesion          | 0.0290           |
| hsa04611: Platelet activation     | 0.0493           |
| <b>Borneol</b>                    |                  |
| hsa04066: HIF-1 signaling pathway | 1.89E-04         |
| hsa04068: FoxO signaling pathway  | 8.60E-04         |
| hsa04210: Apoptosis               | 0.0211           |
